# Supplementary material for: The relationship between EZH2 expression and microRNA-31 in colorectal cancer and the role in evolution of the serrated pathway
Source: PubMed Central journal article supplement (PMC4914316; doi:10.18632/oncotarget.7260), 2016-02-08
Supplement: oncotarget-07-12704-s001.pdf [file oncotarget-07-12704-s001.pdf]

SUPPLEMENTARY FIGURES AND TABLES

EZH2 expression in colorectal cancer tissue and matched normal mucosa

|                       | Score 0<br>(Negative) | Score 1<br>(Weak) | Score 2<br>(Moderate) | Score 3<br>(Strong) | Total | <i>P</i> |
|-----------------------|-----------------------|-------------------|-----------------------|---------------------|-------|----------|
| Colorectal cancer     | 3                     | 10                | 14                    | 23                  | 50    | < 0.0001 |
| Matched normal mucosa | 42                    | 7                 | 1                     | 0                   | 50    |          |

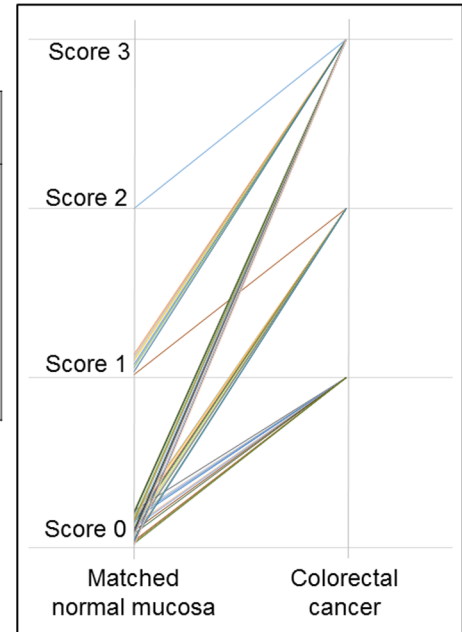

**Supplementary Figure 1: EZH2 expression in 50 colorectal cancer tissues and matched normal mucosa tissues.** EZH2 expression in colorectal cancer tissues was significantly higher than that in normal mucosa ( $P < 0.0001$ ).

### The distributions of microRNA-31 expression in 301 colorectal cancers

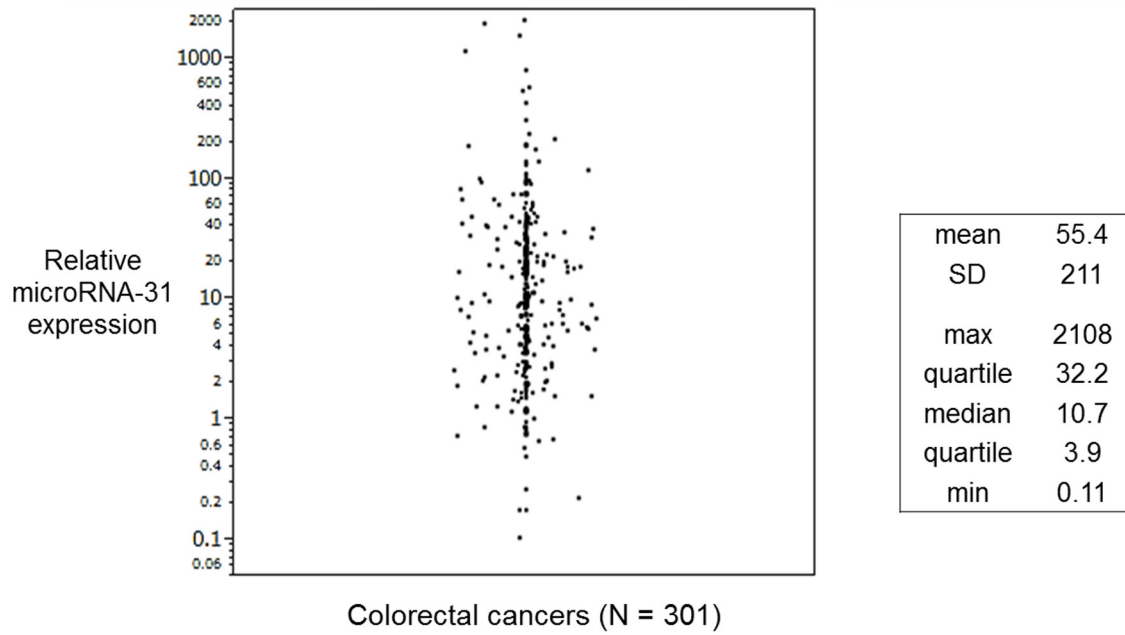

**Supplementary Figure 2: The distributions of microRNA-31 expression in 301 colorectal cancers.** Mean 55.4; median 10.7; standard deviation (SD) 211; range 0.11–2108; interquartile range 3.9–32.2.

## EZH2 expressions in normal colorectal mucosa and premalignant lesions

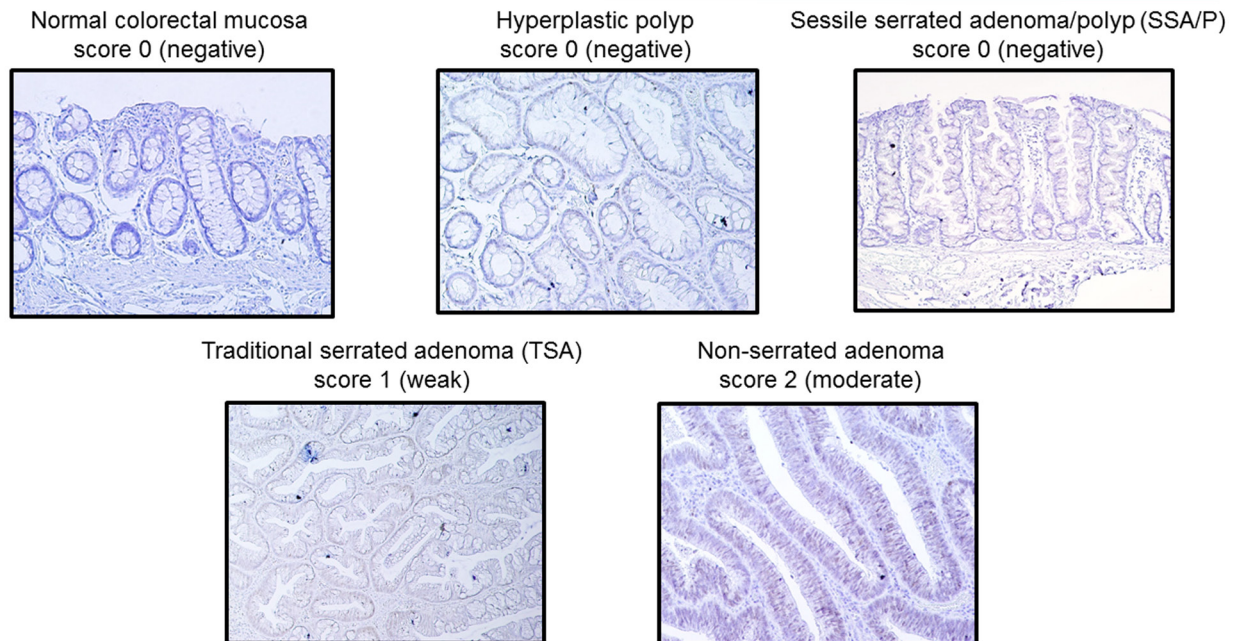

**Supplementary Figure 3: EZH2 expressions in normal colorectal mucosa and premalignant lesions.** Negative EZH2 expression (score 0) was frequently detected in SSA/Ps (76%), compared with HPs (36%), TSAs (25%), and non-serrated adenomas (36%). Moderate (score 2) or strong (score 3) EZH2 expression was not detected in any SSA/P. HP, hyperplastic polyp; SSA/P, sessile serrated adenoma/polyp; TSA, traditional serrated adenoma.

A The siRNA-mediated knockdown of EZH2 caused a significant reduction in EZH2 expression in HT29 and SW480 transfected with EZH2 siRNAs

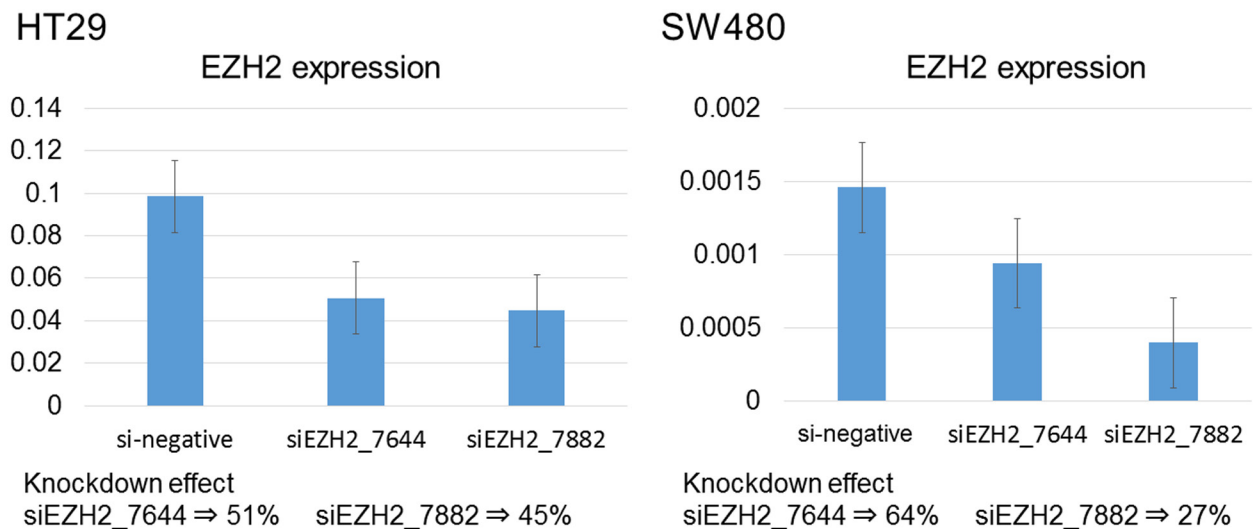

B There was a considerable increase in microRNA-31 (miR-31) expression in HT29 and SW480 cells transfected with EZH2 siRNAs

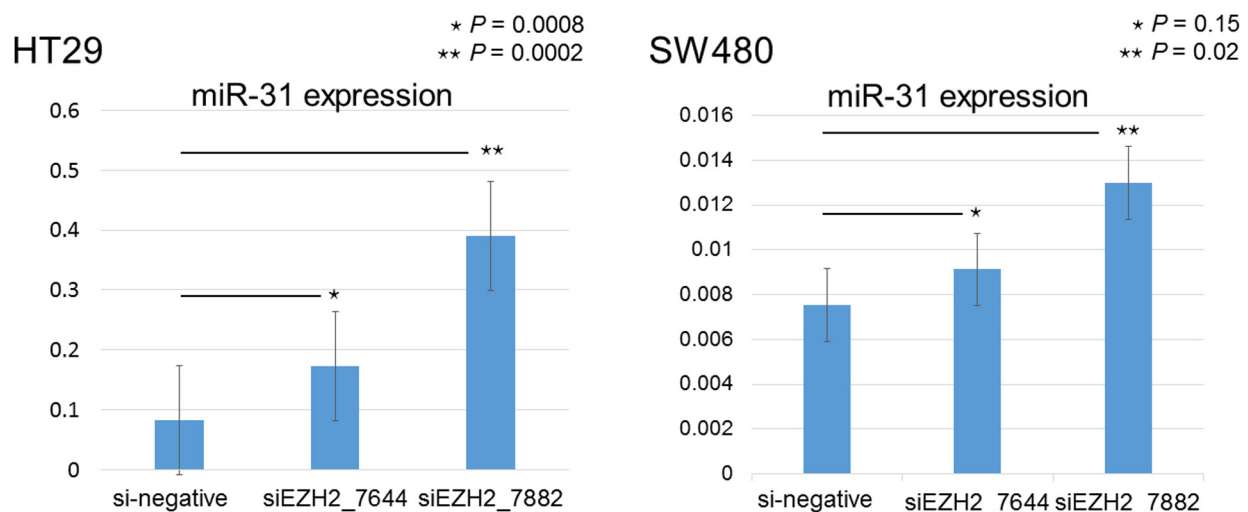

**Supplementary Figure 4: EZH2 knockdown caused microRNA-31 overexpression on quantitative RT-PCR.** A. The siRNA-mediated knockdown of EZH2 caused a significant reduction in EZH2 expression in HT29 and SW480 cells transfected with EZH2 siRNAs (siEZH2\_7644 and siEZH2\_7882). B. There was a considerable increase in miR-31 expression in HT29 and SW480 cells transfected with EZH2 siRNAs (siEZH2\_7644 and siEZH2\_7882). The  $P$ -value was analyzed using paired T-test.

### Histone H3 lysine 27 trimethylation (H3K27me3) levels around the promoter region of microRNA-31 (miR-31) by ChIP assay

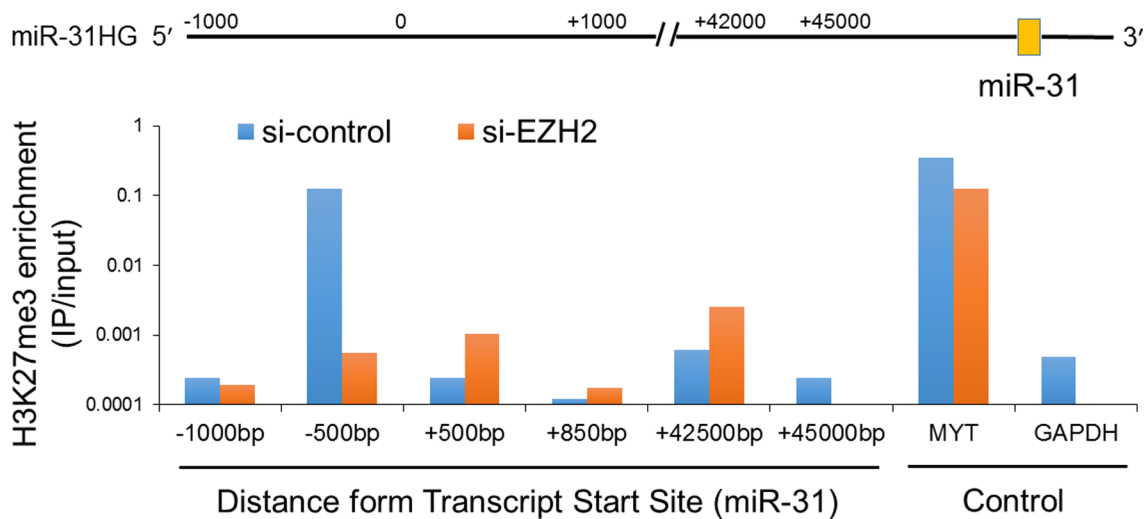

**Supplementary Figure 5: H3K27me3 levels around the promoter region of microRNA-31 by performing ChIP assay.** H3K27me3 was steadily enriched at the promoter region of microRNA-31 in RKO cells. The H3K27me3 levels were decreased after knockdown of EZH2. H3K27me3, histone H3 lysine 27 trimethylation; ChIP, chromatin immunoprecipitation.

## The association of EZH2 expression with microRNA-31 and colorectal cancer-specific survival

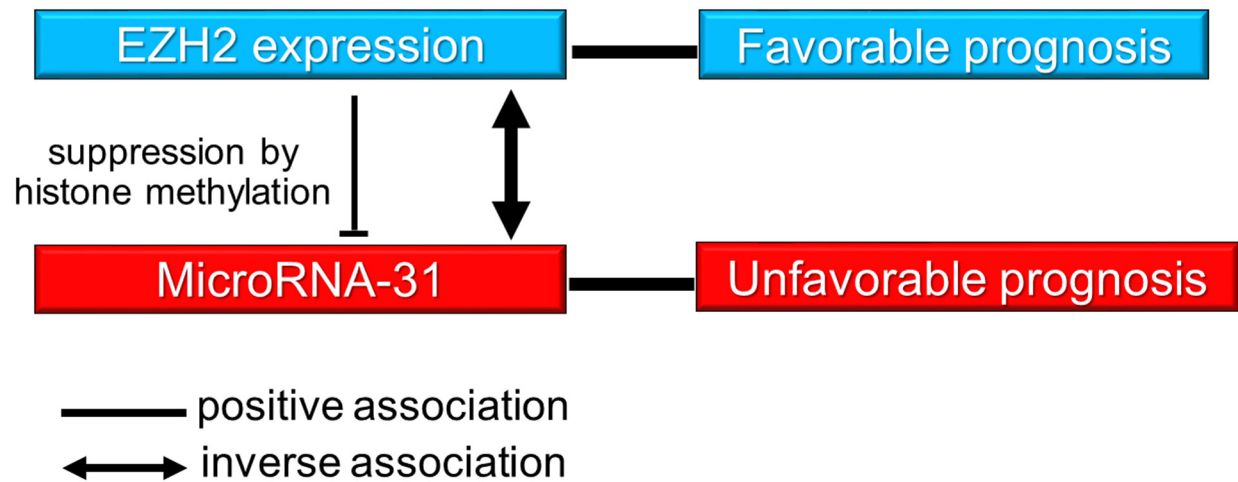

**Supplementary Figure 6: The association of EZH2 expression with microRNA-31 and colorectal cancer-specific survival.** Similar to previous studies, our current data showed that high EZH2 expression was significantly associated with favorable survival. These results are reasonable because we recently reported that high microRNA-31 expression, which is inversely correlated with EZH2 expression, was an unfavorable prognostic factor in patients with colorectal cancer.

Supplementary Table 1: Association of EZH2 expression with patient-mortality in colorectal cancers

| EZH2 status                      | Total N | Cancer-specific survival  |                                 |                                                  |
|----------------------------------|---------|---------------------------|---------------------------------|--------------------------------------------------|
|                                  |         | Univariate HR<br>(95% CI) | Stage-stratified HR<br>(95% CI) | Multivariate stage-<br>stratified HR<br>(95% CI) |
| Low expression group (score 0–2) | 178     | 1 (referent)              | 1 (referent)                    | 1 (referent)                                     |
| High expression group (score 3)  | 123     | 0.48 (0.29-0.77)          | 0.51 (0.29-0.77)                | 0.46 (0.27-0.76)                                 |
| <i>P</i>                         |         | 0.0018                    | 0.0022                          | 0.0022                                           |

The multivariate, stage-stratified Cox model included the EZH2 expression variable stratified by gender, age at diagnosis, tumor size, year of diagnosis, tumor location, tumor differentiation, CIMP status, MSI status, mutations of *BRAF*, *KRAS*, and *PIK3CA*, and microRNA-31 expression.

CI, confidence interval; CIMP, CpG island methylator phenotype; HR, hazard ratio; MSI, microsatellite instability.

Supplementary Table 2: Sequences of chromatin immunoprecipitation (ChIP) primers

| Name       | Forward primer           | Reverse primer       |
|------------|--------------------------|----------------------|
| -1,000 bp  | CCGATGACCTAGCCAGAAGT     | CCCCACCCTTCAACTCGTAG |
| -500 bp    | TATCCTCAACCCTCCGTGTC     | CATACACCTGAAGGGGCAGT |
| +500 bp    | CAATTTTGGCCCAGGAGATA     | TTTCCGGGGACCTCTAGTTT |
| +850bp     | TTTGATTCCGCCCTCTTTGG     | AACGATGGCCCATGCATTC  |
| +42,500 bp | TGGCCTATTTGCTGTTCTAATGAC | GCAAGCCAACCCCAACA    |
| +45,000 bp | AATGGGCCCTGCATTCTCT      | AAAACCCACACCCTCACCAC |
| MYT        | AGGCACCTTCTGTTGGCCGA     | AGGCAGCTGCCTCCCGTACA |
| GAPDH      | CGGCTACTAGCGGTTTTACG     | AAGAAGATGCGGCTGACTGT |
